# Supplementary material
Source: PubMed Central journal article supplement (PMC8960965)
Supplement: mmc1.pdf [file mmc1.pdf]

| Main exposures                                  | Definition                                                                                                        | Years                                              | Data sources*                                                                                                                                                                                                                                                    | Type of accommodation (§)/Diagnosis and drug coding system  | Data authority                                          |
|-------------------------------------------------|-------------------------------------------------------------------------------------------------------------------|----------------------------------------------------|------------------------------------------------------------------------------------------------------------------------------------------------------------------------------------------------------------------------------------------------------------------|-------------------------------------------------------------|---------------------------------------------------------|
| <b>Homelessness during 2020</b>                 | Any homeless shelter use during 2020<br>No homeless shelter use during 2020                                       | 2020                                               | Postal address <sup>†</sup> /The Danish Homeless Register <sup>1</sup>                                                                                                                                                                                           | the Act of Social Services §110                             | Statistics Denmark                                      |
| <b>Definition used for sensitivity analysis</b> |                                                                                                                   |                                                    |                                                                                                                                                                                                                                                                  |                                                             |                                                         |
| <b>History of homelessness</b>                  | Any experience of homelessness<br><br>No experience of homelessness                                               | 1996-2020<br><br>1996-2020                         | Postal address <sup>†</sup> /The Danish Homeless Register <sup>1</sup> /The Registry of Drug Abusers Undergoing Treatment <sup>2</sup> /The National Registry of Alcohol Treatment <sup>3</sup><br><br>No information on homelessness based on the sources above | the Act of Social Services §110; self-reported homelessness | Statistics Denmark/<br>The Danish Health Data Authority |
| <b>Imprisonment during 2020</b>                 | Any imprisonment during 2020<br>No imprisonment during 2020                                                       | 2020<br>2020                                       | The Danish Central Criminal Register <sup>4</sup>                                                                                                                                                                                                                |                                                             | Statistics Denmark                                      |
| <b>Definition used for sensitivity analysis</b> |                                                                                                                   |                                                    |                                                                                                                                                                                                                                                                  |                                                             |                                                         |
| <b>History of imprisonment</b>                  | Any history of imprisonment<br>No history of imprisonment                                                         | 1991-2020<br>1991-2020                             |                                                                                                                                                                                                                                                                  |                                                             |                                                         |
| <b>Supported psychiatric housing</b>            | Any supported psychiatric housing postal address during 2020<br>No supported psychiatric housing during 2020      | 2020<br>2020                                       | Postal address <sup>†</sup>                                                                                                                                                                                                                                      | the Act of Social Services §107/108                         | Statistics Denmark                                      |
| <b>Psychiatric admission</b>                    | Any psychiatric admission during<br><br>No psychiatric admission during                                           | 2020<br><br>2020                                   | The Danish National Patient Register <sup>5</sup>                                                                                                                                                                                                                | ICD-10                                                      | The Danish Health Data Authority                        |
| <b>Severe mental illness</b>                    | Any severe mental illness prior to study start<br>No severe mental illness prior to study start                   | 1969-2020<br>(Dec 27)                              | The Danish Psychiatric Central Research <sup>6</sup><br>Register/The Danish National Patient Register <sup>5</sup>                                                                                                                                               | ICD-8; ICD-10                                               | The Danish Health Data Authority                        |
| <b>Substance abuse</b>                          | Any alcohol or drug use disorder prior to study start<br><br>No alcohol or drug use disorder prior to study start | 1969-2020<br>(Dec 27)<br><br>1969-2020<br>(Dec 27) | The Danish Psychiatric Central Research Register/The Danish National Patient Register/The Danish National Prescription Registry <sup>7</sup> /The National Registry of Alcohol Treatment/The Registry of Drug Abusers Undergoing Treatment                       | ICD-8; ICD-10; ATC                                          | The Danish Health Data Authority                        |
| <b>Chronic medical condition</b>                | Any chronic medical condition since Jan 1, 2016 and until study start                                             | 2016-2020<br>(Dec 27)                              | The Danish National Patient Register/ the Danish National Prescription Registry                                                                                                                                                                                  | ICD-10; ATC                                                 | The Danish Health Data Authority                        |

| <b>Supplementary exposures</b>                                                                                                                                                                                                                        | <b>Definition</b>                                                    | <b>Years</b>       | <b>Data sources*</b>                                                                                            | <b>Type of accommodation (§)/Diagnosis and drug coding system</b> | <b>Data authority</b>            |
|-------------------------------------------------------------------------------------------------------------------------------------------------------------------------------------------------------------------------------------------------------|----------------------------------------------------------------------|--------------------|-----------------------------------------------------------------------------------------------------------------|-------------------------------------------------------------------|----------------------------------|
|                                                                                                                                                                                                                                                       | No chronic medical condition since Jan 1, 2016 and until study start | 2016-2020 (Dec 27) |                                                                                                                 |                                                                   |                                  |
| <b>Highest completed educational level</b>                                                                                                                                                                                                            | Primary school                                                       | Sept 2019          | Register information on highest educational level from the IDA database                                         |                                                                   | Statistics Denmark               |
|                                                                                                                                                                                                                                                       | Higher than primary school (missing values included)                 | Sept 2019          |                                                                                                                 |                                                                   |                                  |
| <b>Crisis shelter stay during 2020</b>                                                                                                                                                                                                                | Any experience of residing/staying in a crisis shelter during 2020   | 2020               | Postal address <sup>‡</sup> ; Register information on women and children's stays during crisis                  | the Act of Social Services §109                                   | Statistics Denmark               |
|                                                                                                                                                                                                                                                       | No experience of residing/staying in a crisis shelter during 2020    | 2020               |                                                                                                                 |                                                                   |                                  |
| <b>First diagnosis of severe mental illness during 2020</b>                                                                                                                                                                                           | Any recently diagnosed severe mental illness                         | 2020               | The Danish National Patient Register <sup>5</sup>                                                               | ICD-10                                                            | The Danish Health Data Authority |
|                                                                                                                                                                                                                                                       | No recently diagnosed severe mental illness                          | 2020               |                                                                                                                 |                                                                   |                                  |
| <b>Mental disorder</b>                                                                                                                                                                                                                                | Any mental diagnosis prior to study start                            | 1969-2020 (Dec 27) | The Danish Psychiatric Central Research <sup>6</sup> Register/The Danish National Patient Register <sup>5</sup> | ICD-8; ICD-10                                                     | The Danish Health Data Authority |
|                                                                                                                                                                                                                                                       | No mental diagnosis prior to study start                             | 1969-2020 (Dec 27) |                                                                                                                 |                                                                   |                                  |
| <b>Medical overweight</b>                                                                                                                                                                                                                             | Any pre-existing medical overweight                                  | 1977-2020 (Dec 27) | The Danish National Patient Register/ the Danish National Prescription Registry                                 | ICD-8; ICD-10; ATC                                                | The Danish Health Data Authority |
|                                                                                                                                                                                                                                                       | No pre-existing medical overweight                                   |                    |                                                                                                                 |                                                                   |                                  |
| <b>History of infection with hospital contact</b>                                                                                                                                                                                                     | Any history of infection with hospital contact                       | 1977-2020 (Dec 27) | The Danish National Patient Register                                                                            | ICD-8 and ICD-10                                                  | The Danish Health Data Authority |
|                                                                                                                                                                                                                                                       | No history of infection with hospital contact                        |                    |                                                                                                                 |                                                                   |                                  |
| *Having a postal address during 2020 was defined as the period from Jan 1, 2020 and until Nov 11, 2020 (latest update). † The addresses from the "Tilbudsportalen" <sup>8</sup> were validated by corresponding street codes in Denmark. <sup>9</sup> |                                                                      |                    |                                                                                                                 |                                                                   |                                  |
| <b>Supplementary table 1: Definitions of population groups covariates used in the study</b>                                                                                                                                                           |                                                                      |                    |                                                                                                                 |                                                                   |                                  |

| <b>Disease group</b>                                                                                             | <b>Coding definition</b>                          | <b>ICD-10 (Diagnosis time frame)</b> | <b>ICD-8</b>                                                                           | <b>Drug codes (ATC) (Time frame for prescriptions)</b>    |
|------------------------------------------------------------------------------------------------------------------|---------------------------------------------------|--------------------------------------|----------------------------------------------------------------------------------------|-----------------------------------------------------------|
| <b>Mental disorder</b>                                                                                           | Diagnosis                                         | F00, F20-F99                         | 290-315 (excl. 291.x9, 303.x9, 303.20, 303.28, 303.90, 571.00, 571.01, 294.39, 304.x9) |                                                           |
| <b>Any severe mental illness</b>                                                                                 | Diagnosis                                         | F20, F30-31, F32-33                  |                                                                                        |                                                           |
| <b>Any substance abuse</b>                                                                                       | Diagnosis AND/OR prescriptions AND/OR self-report | F10-F19                              | 291.x9, 303.x9, 303.20, 303.28, 303.90, 571.00, 571.01, 294.39, 304.x9                 | N07BB (alcohol dependence),<br>N07BC (opioids dependence) |
| <b><i>Supplementary table 2: Definitions of psychiatric disorders based on ICD-10, ICD-8, and ATC-codes*</i></b> |                                                   |                                      |                                                                                        |                                                           |

| Category                              | Disease group                       | Definition                                                                               | ICD-10 Codes                                 | Drug codes (ATC) (Time frame for prescriptions)         |
|---------------------------------------|-------------------------------------|------------------------------------------------------------------------------------------|----------------------------------------------|---------------------------------------------------------|
| <b>Any chronic medical condition*</b> |                                     |                                                                                          |                                              |                                                         |
| <b>Circulatory system</b>             |                                     |                                                                                          |                                              |                                                         |
|                                       | Hypertension                        | Diagnosis AND/OR prescriptions of antihypertensives <sup>†</sup>                         | I10-I13, I15                                 | C02, C03, C04, C07, C08, C09 (Twice in 1 year)          |
|                                       | Dyslipidemia                        | Diagnosis AND/OR prescription of lipid-lowering drugs <sup>‡</sup>                       | E78                                          | C10 (Twice in 1 year)                                   |
|                                       | Ischemic heart disease              | Diagnosis AND/OR prescription for antianginal drug                                       | I20-I25                                      | C01DA (Twice in 1 year)                                 |
|                                       | Atrial fibrillation                 | Diagnosis                                                                                | I48                                          |                                                         |
|                                       | Heart failure                       | Diagnosis                                                                                | I50                                          |                                                         |
|                                       | Peripheral artery occlusive disease | Diagnosis                                                                                | I70-I74                                      |                                                         |
|                                       | Stroke                              | Diagnosis                                                                                | I60-I64, I69                                 |                                                         |
| <b>Endocrine system</b>               |                                     |                                                                                          |                                              |                                                         |
|                                       | Diabetes mellitus                   | Diagnosis AND/OR prescription of antidiabetics                                           | E10-E14                                      | A10A, A10B (Twice in 1 year)                            |
|                                       | Thyroid disorder                    | Diagnosis AND/OR prescription of thyroid therapy drugs                                   | E00-E05, E061-E069, E07                      | H03 (Twice in 1 year)                                   |
|                                       | Gout                                | Diagnosis                                                                                | E79, M10                                     |                                                         |
| <b>Pulmonary system and allergy</b>   |                                     |                                                                                          |                                              |                                                         |
|                                       | Chronic pulmonary disease           | Diagnosis AND/OR Prescription for obstructive airway disease drugs                       | J40-J47                                      | R03 (Twice in 1 year)                                   |
|                                       | Allergy                             | Diagnosis AND/OR prescription for non-sedative antihistamines AND/OR nasal antiallergics | J30.1-J30.4, L23, L50.0, T78.0, T78.2, T78.4 | R06AX, R06AE07, R06AE09, R01AC, R01AD (Twice in 1 year) |
| <b>Gastrointestinal system</b>        |                                     |                                                                                          |                                              |                                                         |
|                                       | Ulcer/chronic gastritis             | Diagnosis                                                                                | K221, K25-K28, K293-K295                     |                                                         |
|                                       | Chronic liver disease               | Diagnosis                                                                                | B16-B19, K70, K74, K766, I85                 |                                                         |
|                                       | Inflammatory bowel disease          | Diagnosis                                                                                | K50-K51                                      |                                                         |
|                                       | Diverticular disease of intestine   | Diagnosis                                                                                | K57                                          |                                                         |
| <b>Urogenital system</b>              |                                     |                                                                                          |                                              |                                                         |
|                                       | Chronic kidney disease              | Diagnosis                                                                                | N03, N11, N18-N19 (ever)                     |                                                         |
|                                       | Prostate disorders                  | Diagnosis AND/OR prescription of prostate hyperplasia therapy drugs                      | N40                                          | C02CA, G04C (Twice in 1 year)                           |
| <b>Musculoskeletal system</b>         |                                     |                                                                                          |                                              |                                                         |
|                                       | Connective tissue disorders         |                                                                                          | M05-M06, M08-M09, M30-M36, D86 (ever)        |                                                         |
|                                       | Osteoporosis                        | Diagnosis AND/OR prescriptions for osteoporosis drugs                                    | M80-M82 (ever)                               | M05B, G03XC01, H05AA (Twice in 1 year)                  |
|                                       | Painful condition                   | Repeated prescriptions of analgesics                                                     |                                              | N02A, N02BA51, N02BE, M01A, M02A (Four times in 1 year) |
| <b>Hematological system</b>           |                                     |                                                                                          |                                              |                                                         |
|                                       | HIV/AIDS                            | Diagnosis                                                                                | B20-B24                                      |                                                         |
|                                       | Anemias                             | Diagnosis                                                                                | D50-D53, D55-D59, D60-D61, D63-D64           |                                                         |
| <b>Cancers</b>                        |                                     |                                                                                          |                                              |                                                         |
|                                       | Cancer                              | Diagnosis                                                                                | C00-C43, C45-C97                             |                                                         |
| <b>Neurological system</b>            |                                     |                                                                                          |                                              |                                                         |
|                                       | Vision problem                      | Diagnosis                                                                                | H40, H25, H54 (ever)                         |                                                         |
|                                       | Hearing problem                     | Diagnosis                                                                                | H90-H91, H931 (ever)                         |                                                         |

|                                                                         |                                                               |                                                                                                                                                                                                 |                        |
|-------------------------------------------------------------------------|---------------------------------------------------------------|-------------------------------------------------------------------------------------------------------------------------------------------------------------------------------------------------|------------------------|
| Migraine                                                                | Diagnosis AND/OR prescription of specific anti-migraine drugs | G43                                                                                                                                                                                             | N02C (Twice in 1 year) |
| Epilepsy                                                                | Diagnosis AND prescription of anti-epileptics                 | G40-G41                                                                                                                                                                                         | N03 (Twice in 1 year)  |
| Parkinson's disease                                                     | Diagnosis                                                     | G20-G22                                                                                                                                                                                         |                        |
| Multiple sclerosis                                                      | Diagnosis                                                     | G35                                                                                                                                                                                             |                        |
| Neuropathies                                                            | Diagnosis                                                     | G50-G64                                                                                                                                                                                         |                        |
| <b>Others</b>                                                           |                                                               |                                                                                                                                                                                                 |                        |
| Overweight and obesity                                                  | Diagnosis AND prescription                                    | E66                                                                                                                                                                                             | A08                    |
| <b>History of infectious diseases with hospital contact<sup>§</sup></b> |                                                               |                                                                                                                                                                                                 |                        |
| Any infection                                                           | Diagnosis                                                     | All below                                                                                                                                                                                       |                        |
| Sepsis                                                                  | Diagnosis                                                     | A40-A41                                                                                                                                                                                         |                        |
| Respiratory infections                                                  | Diagnosis                                                     |                                                                                                                                                                                                 |                        |
| Pneumonia                                                               | Diagnosis                                                     | J12-J18, A48.1, A70.9                                                                                                                                                                           |                        |
| Other respiratory infections                                            | Diagnosis                                                     | J00-J11                                                                                                                                                                                         |                        |
| Gastrointestinal infection                                              | Diagnosis                                                     | A00-A09, K35                                                                                                                                                                                    |                        |
| Urinary tract infections                                                | Diagnosis                                                     | N10, N30.0, N39.0                                                                                                                                                                               |                        |
| Central nervous system infections                                       | Diagnosis                                                     | A17, A32.1, A39.0, A81, A83-A89, B00.3, B00.4, B01.0, B01.1, B02.0, B02.1, B05.0, B05.1, B06.0, B26.1, B26.2, B58.2, G00-G01, G02.0, G02.1, G02.8, G03-G04, G05.0, G05.1, G05.2, G05.8, G06-G07 |                        |
| HIV or hepatitis infections                                             | Diagnosis                                                     | B15-B19, B20-24                                                                                                                                                                                 |                        |
| Other infections                                                        | Diagnosis                                                     | A00-B99 (excluding all the above-mentioned codes), L00-L08, M00, N45, N70-N72, N76-N77, O23, O26.4, O85-O86, O98                                                                                |                        |

<sup>\*</sup>The chronic medical conditions are defined primarily according to previous studies.<sup>10,11</sup> They are based on ICD-10 diagnoses from Jan 1, 2016 and until Dec 27, 2020 (study start). <sup>†</sup>Ascertained only in absence of ischemic heart disease/heart failure, and by diuretics only if no kidney disease. <sup>‡</sup>Prescriptions used if no previous ischemic heart disease. <sup>§</sup>Infections with hospital contact defined according to a previous study.<sup>12</sup>

**Supplementary table 3: Algorithm for chronic medical health conditions, medical overweight, and infections**

**Supplementary Figure 1: Cumulative vaccine uptake overall and by sex, Dec 27, 2020 to Oct 15, 2021**

**a. Overall**

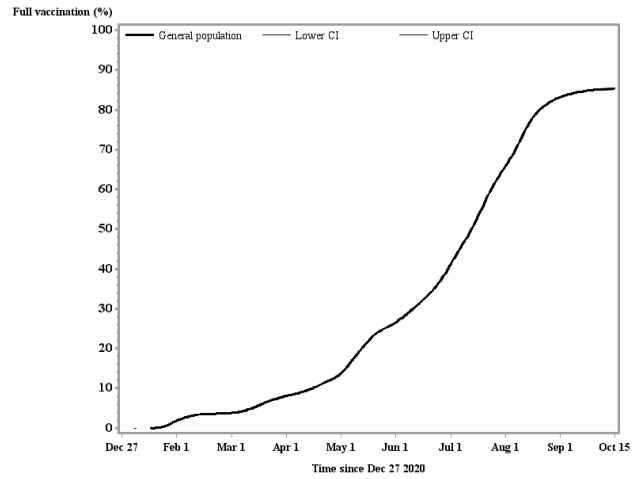

**b. Overall below age 65 years**

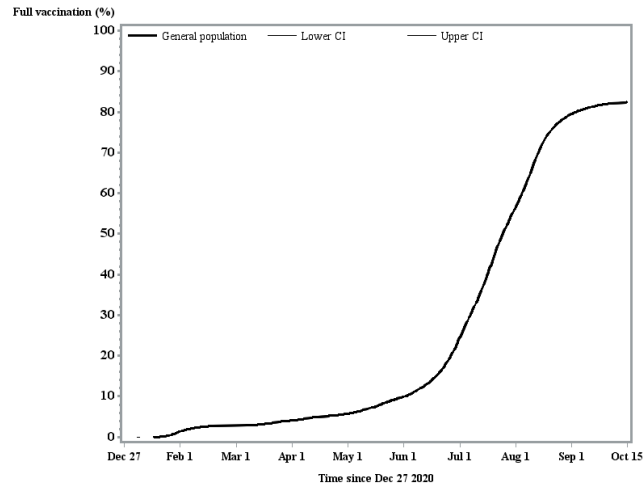

**c. Overall age 65+ years**

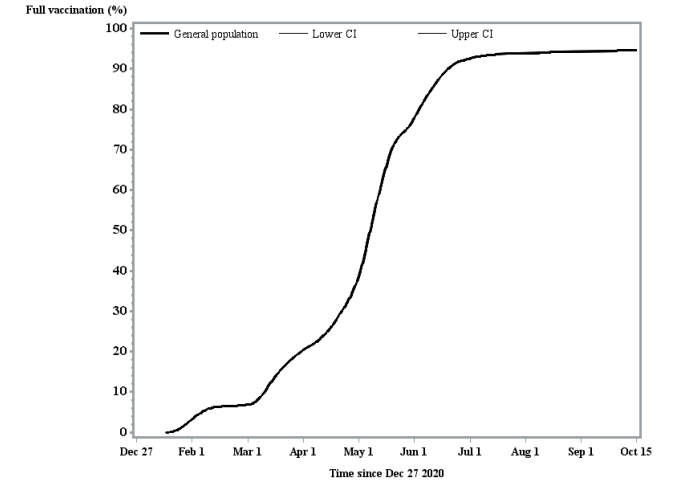

**d. By sex (age below 65 years)**

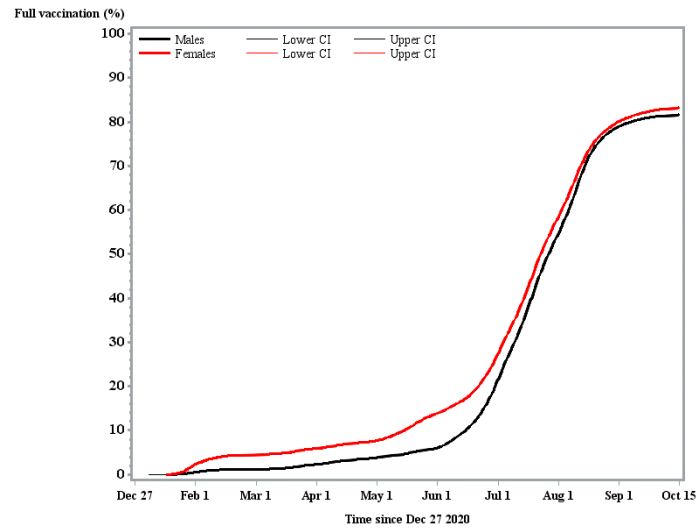

**e. By sex (age 65+ years)**

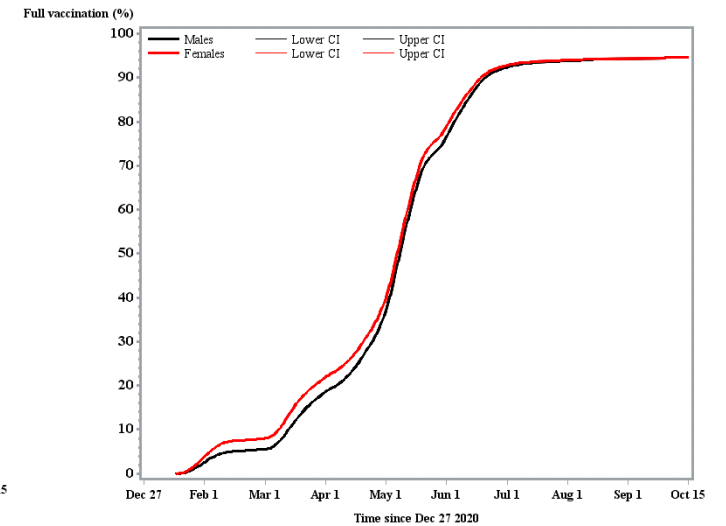

|                                                                                                                                                                                                                   | Age 15-64 years             |                          |         |             |         | Age 65+                     |                          |         |             |         |
|-------------------------------------------------------------------------------------------------------------------------------------------------------------------------------------------------------------------|-----------------------------|--------------------------|---------|-------------|---------|-----------------------------|--------------------------|---------|-------------|---------|
|                                                                                                                                                                                                                   | 2 <sup>nd</sup> vaccine (n) | Individuals for analysis | CIF (%) | (95% CI)    | P value | 2 <sup>nd</sup> vaccine (n) | Individuals for analysis | CIF (%) | (95% CI)    | P value |
| The Danish general population                                                                                                                                                                                     | 2,949,189                   | 3,592,612                | 82.4    | (82.4-82.5) |         | 1,098,398                   | 1,161,051                | 94.6    | (94.6-94.7) |         |
| <b>Sex</b>                                                                                                                                                                                                        |                             |                          |         |             |         |                             |                          |         |             |         |
| Males                                                                                                                                                                                                             | 1,475,579                   | 1,815,492                | 81.7    | (81.6-81.7) | <0.0001 | 505,788                     | 534,878                  | 94.6    | (94.5-94.6) | <0.0001 |
| Females                                                                                                                                                                                                           | 1,473,610                   | 1,777,120                | 83.3    | (83.2-83.3) |         | 592,610                     | 626,173                  | 94.7    | (94.6-94.7) |         |
| CIF=cumulative incidence function                                                                                                                                                                                 |                             |                          |         |             |         |                             |                          |         |             |         |
| *Analysis has considered competing risk from death and SARS-CoV-2 infection. For the Johnson & Johnson vaccine, only one vaccine was required, and thus, the first vaccine date equal to the second vaccine date. |                             |                          |         |             |         |                             |                          |         |             |         |
| <b>Supplementary table 4: Cumulative vaccine uptake overall and by sex, Dec 27, 2020 to Oct 15, 2021*</b>                                                                                                         |                             |                          |         |             |         |                             |                          |         |             |         |

Supplementary Figure 2: Cumulative vaccine uptake by target groups, Dec 27, 2020 to Oct 15, 2021\*

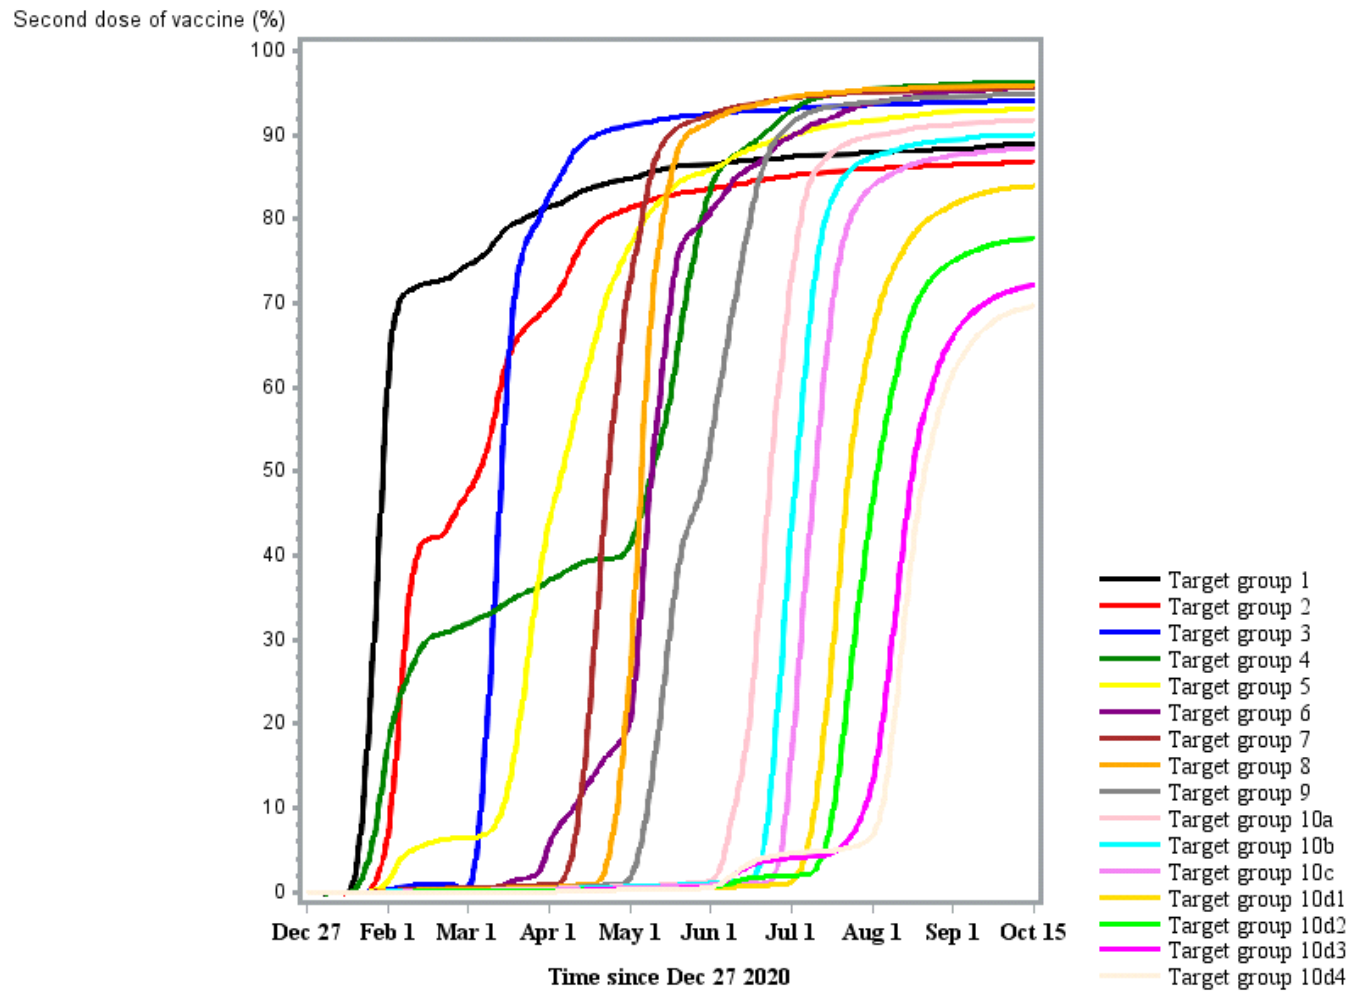

\*Target groups are defined in the supplementary table below.



|                                                                                                                  |                                                                                                                                                                            | 2 <sup>nd</sup> vaccine (n) | Individuals for analysis | CIF (%) | (95% CI)     |
|------------------------------------------------------------------------------------------------------------------|----------------------------------------------------------------------------------------------------------------------------------------------------------------------------|-----------------------------|--------------------------|---------|--------------|
| <b>Target groups</b>                                                                                             | <b>Definition of target group</b>                                                                                                                                          |                             |                          |         |              |
| 1                                                                                                                | Residents in nursing homes ect.                                                                                                                                            | 46,798                      | 52,616                   | 89.0    | (88.7-89.2)  |
| 2                                                                                                                | Citizens aged over 65 who receive both practical assistance and personal care                                                                                              | 50,164                      | 57,782                   | 86.8    | (86.8-87.1)  |
| 3                                                                                                                | Citizens born up to 1936 (aged over 85 years)                                                                                                                              | 90,979                      | 96,720                   | 94.1    | (93.9-94.2)  |
| 4                                                                                                                | Selected frontline staff in the healthcare sector, the elderly care sector, and parts of the social services sector                                                        | 277,003                     | 287,681                  | 96.3    | (96.2-96.4)  |
| 5                                                                                                                | Selected patients at particularly high risk, e.g. cancer patients, severely immunosuppressed patients and people with very severe cardiopulmonary disease or liver disease | 223,873                     | 340,317                  | 93.2    | (93.1-93.3)  |
| 6                                                                                                                | Selected relatives of people at particularly high risk                                                                                                                     | 1963                        | 2054                     | 95.6    | (94.6-96.4)  |
| 7                                                                                                                | Citizens born 1937-1941 (aged 80-84 years)                                                                                                                                 | 121,473                     | 127,020                  | 95.6    | (95.5-95.7)  |
| 8                                                                                                                | Citizens born 1942-1946 (aged 75-79)                                                                                                                                       | 216,561                     | 225,702                  | 96.0    | (95.9-96.0)  |
| 9                                                                                                                | Citizens born 1947-1956 (aged 65-74 years)                                                                                                                                 | 504,992                     | 532,285                  | 94.9    | (94.8-94.9)  |
| 10a                                                                                                              | Citizens born 1957-1961                                                                                                                                                    | 254,710                     | 277,596                  | 91.8    | (91.7-91.9)  |
| 10b                                                                                                              | Citizens born 1962-1966                                                                                                                                                    | 305,422                     | 338,868                  | 90.2    | (90.1-90.3)  |
| 10c                                                                                                              | Citizens born 1967-1971                                                                                                                                                    | 290,789                     | 329,027                  | 88.4    | (88.3-88.6)  |
| 10d1                                                                                                             | Citizens born 1972-1976 and 2002-2005                                                                                                                                      | 490,049                     | 584,100                  | 84.0    | (83.9-84.1)  |
| 10d2                                                                                                             | Citizens born 1977-1981 and 1997-2001                                                                                                                                      | 482,329                     | 621,797                  | 77.8    | (77.7-77.9)  |
| 10d3                                                                                                             | Citizens born 1982-1986 and 1992-1996                                                                                                                                      | 460,901                     | 640,970                  | 72.2    | (72.0-72.3)  |
| 10d4                                                                                                             | Citizens born 1987-1991                                                                                                                                                    | 229,581                     | 329,763                  | 69.8    | (69.7-70.09) |
| Definitions from the Danish Health Authority's vaccine strategy and calendar. <sup>13</sup>                      |                                                                                                                                                                            |                             |                          |         |              |
| <b>Supplementary table 5: Cumulative vaccine uptake estimates by target groups, Dec 27, 2020 to Oct 15, 2021</b> |                                                                                                                                                                            |                             |                          |         |              |

|                                                                                                                                                                                                                   | Age 15-64 years             |                          |         |             |         | Age 65+                     |                          |         |             |         |
|-------------------------------------------------------------------------------------------------------------------------------------------------------------------------------------------------------------------|-----------------------------|--------------------------|---------|-------------|---------|-----------------------------|--------------------------|---------|-------------|---------|
|                                                                                                                                                                                                                   | 2 <sup>nd</sup> vaccine (n) | Individuals for analysis | CIF (%) | (95% CI)    | P value | 2 <sup>nd</sup> vaccine (n) | Individuals for analysis | CIF (%) | (95% CI)    | P value |
| The Danish general population                                                                                                                                                                                     | 2,949,189                   | 3,592,612                | 82.4    | (82.4-82.5) |         | 1,098,398                   | 1,161,051                | 94.6    | (94.6-94.7) |         |
| <b>Homelessness during 2020</b>                                                                                                                                                                                   |                             |                          |         |             |         |                             |                          |         |             |         |
| Yes                                                                                                                                                                                                               | 3486                        | 6407                     | 54.6    | (53.4-55.8) | <0.0001 | 220                         | 282                      | 78.0    | (72.7-82.4) | <0.0001 |
| No                                                                                                                                                                                                                | 2,945,703                   | 3,586,205                | 82.5    | (82.5-82.5) |         | 1,098,178                   | 1,160,769                | 94.6    | (94.6-94.7) |         |
| <b>Imprisonment during 2020</b>                                                                                                                                                                                   |                             |                          |         |             |         |                             |                          |         |             |         |
| Yes                                                                                                                                                                                                               | 22680                       | 40,469                   | 56.2    | (55.7-56.7) | <0.0001 | 2277                        | 2718                     | 83.9    | (82.4-85.2) | <0.0001 |
| No                                                                                                                                                                                                                | 2,926,509                   | 3,552,143                | 82.7    | (82.7-82.8) |         | 1,096,121                   | 1,158,333                | 94.6    | (94.6-94.7) |         |
| <b>Substance abuse</b>                                                                                                                                                                                            |                             |                          |         |             |         |                             |                          |         |             |         |
| Yes                                                                                                                                                                                                               | 158,404                     | 214,181                  | 74.1    | (73.9-74.2) | <0.0001 | 60,233                      | 66,804                   | 90.2    | (89.0-90.4) | <0.0001 |
| No                                                                                                                                                                                                                | 2,790,785                   | 3,378,431                | 83.0    | (82.9-83.0) |         | 1,038,165                   | 1,094,247                | 94.9    | (94.9-94.9) |         |
| <b>Severe mental illness</b>                                                                                                                                                                                      |                             |                          |         |             |         |                             |                          |         |             |         |
| Yes                                                                                                                                                                                                               | 160,798                     | 203,822                  | 79.0    | (78.8-79.2) | <0.0001 | 58,499                      | 64,373                   | 90.9    | (90.7-91.1) | <0.0001 |
| No                                                                                                                                                                                                                | 2,788,391                   | 3,388,790                | 82.7    | (82.6-82.7) |         | 1,039,899                   | 1,096,678                | 94.8    | (94.8-94.9) |         |
| <b>Supported psychiatric housing during 2020</b>                                                                                                                                                                  |                             |                          |         |             |         |                             |                          |         |             |         |
| Yes                                                                                                                                                                                                               | 6527                        | 8523                     | 76.7    | (75.8-77.6) | <0.0001 | 607                         | 706                      | 86.0    | (83.2-88.3) | 0.024   |
| No                                                                                                                                                                                                                | 2,942,662                   | 3,584,089                | 82.5    | (82.4-82.5) |         | 1,097,791                   | 1,160,345                | 94.6    | (94.6-94.7) |         |
| <b>Psychiatric hospital admission during 2020</b>                                                                                                                                                                 |                             |                          |         |             |         |                             |                          |         |             |         |
| Yes                                                                                                                                                                                                               | 6197                        | 8502                     | 73.1    | (72.2-74.1) | <0.0001 | 4034                        | 4659                     | 86.6    | (85.6-87.5) | <0.0001 |
| No                                                                                                                                                                                                                | 2,942,992                   | 3,584,110                | 82.5    | (82.4-82.5) |         | 1,094,364                   | 1,156,392                | 94.7    | (94.6-94.7) |         |
| <b>Chronic medical condition</b>                                                                                                                                                                                  |                             |                          |         |             |         |                             |                          |         |             |         |
| Yes                                                                                                                                                                                                               | 1,303,223                   | 1,502,983                | 86.8    | (86.8-86.9) | <0.0001 | 964,951                     | 1,015,431                | 95.0    | (95.0-95.1) | <0.0001 |
| No                                                                                                                                                                                                                | 1,645,966                   | 2,089,629                | 79.3    | (79.2-79.3) |         | 133,447                     | 145,620                  | 91.7    | (91.5-91.8) |         |
| CIF=cumulative incidence function                                                                                                                                                                                 |                             |                          |         |             |         |                             |                          |         |             |         |
| *Analysis has considered competing risk from death and SARS-CoV-2 infection. For the Johnson & Johnson vaccine, only one vaccine was required, and thus, the first vaccine date equal to the second vaccine date. |                             |                          |         |             |         |                             |                          |         |             |         |
| <b>Supplementary table 6: Cumulative vaccine uptake estimates by population groups and age-groups (15-64 and 65+ years), Dec 27, 2020 to Oct 15, 2021*</b>                                                        |                             |                          |         |             |         |                             |                          |         |             |         |

|                                                                                                                                                             | Days between first and second vaccine dose uptake |                            |                             |                             |                             |
|-------------------------------------------------------------------------------------------------------------------------------------------------------------|---------------------------------------------------|----------------------------|-----------------------------|-----------------------------|-----------------------------|
|                                                                                                                                                             | 1 <sup>st</sup> percentile                        | 5 <sup>th</sup> percentile | 50 <sup>th</sup> percentile | 95 <sup>th</sup> percentile | 99 <sup>th</sup> percentile |
| General population                                                                                                                                          | 21                                                | 21                         | 35                          | 43                          | 86                          |
| <b>Main population groups</b>                                                                                                                               |                                                   |                            |                             |                             |                             |
| Homelessness during 2020                                                                                                                                    | 21                                                | 21                         | 29                          | 46                          | 90                          |
| Imprisonment during 2020                                                                                                                                    | 21                                                | 21                         | 35                          | 43                          | 81                          |
| Substance abuse                                                                                                                                             | 21                                                | 21                         | 35                          | 44                          | 86                          |
| Severe mental illness                                                                                                                                       | 21                                                | 21                         | 35                          | 44                          | 86                          |
| Supported psychiatric housing during 2020                                                                                                                   | 21                                                | 21                         | 28                          | 42                          | 79                          |
| Psychiatric hospital admission during 2020                                                                                                                  | 21                                                | 21                         | 28                          | 42                          | 85                          |
| Chronic medical condition                                                                                                                                   | 21                                                | 21                         | 33                          | 42                          | 85                          |
| <b>Supplementary population groups</b>                                                                                                                      |                                                   |                            |                             |                             |                             |
| Low educational level                                                                                                                                       | 21                                                | 21                         | 35                          | 42                          | 80                          |
| Crisis shelter stay                                                                                                                                         | 21                                                | 21                         | 35                          | 43                          | 86                          |
| Severe mental illness diagnosed during 2020                                                                                                                 | 21                                                | 21                         | 35                          | 42                          | 85                          |
| Any mental disorder                                                                                                                                         | 21                                                | 21                         | 35                          | 45                          | 87                          |
| Medical overweight                                                                                                                                          | 21                                                | 21                         | 35                          | 76                          | 89                          |
| History of infection with hospital contact                                                                                                                  | 21                                                | 21                         | 35                          | 46                          | 86                          |
| *Individuals with the Johnson & Johnson vaccine only had one vaccine and these individuals were excluded from this analysis.                                |                                                   |                            |                             |                             |                             |
| <b>Supplementary table 7: Percentiles of the number of days between first and second vaccine uptake by population groups, Dec 27, 2020 to Oct 15, 2021*</b> |                                                   |                            |                             |                             |                             |

|                                                   | 2 <sup>nd</sup> vaccine<br>(n)/person-years | Male                        |           |                             |           | Female                      |        |                             |        |           |
|---------------------------------------------------|---------------------------------------------|-----------------------------|-----------|-----------------------------|-----------|-----------------------------|--------|-----------------------------|--------|-----------|
|                                                   |                                             | Model 1 <sup>†</sup><br>IRR | 95% CI    | Model 2 <sup>‡</sup><br>IRR | 95% CI    | Model 1 <sup>†</sup><br>IRR | 95% CI | Model 2 <sup>‡</sup><br>IRR | 95% CI |           |
| <b>Overall</b>                                    | 2,095,180/1,302,020                         |                             |           |                             |           | 2,182,200/1,258,961         |        |                             |        |           |
| <b>Homelessness during 2020</b>                   |                                             |                             |           |                             |           |                             |        |                             |        |           |
| Any                                               | 2929/3050                                   | 0.5                         | (0.5-0.6) | 0.6                         | (0.5-0.6) | 900/1034                    | 0.4    | (0.4-0.5)                   | 0.4    | (0.4-0.5) |
| No                                                | 2,092,251/1,298,970                         | 1                           |           | 1                           |           | 2,181,300/1,257,927         | 1      |                             | 1      |           |
| <b>Imprisonment during 2020</b>                   |                                             |                             |           |                             |           |                             |        |                             |        |           |
| Any                                               | 24,110/26,204                               | 0.5                         | (0.5-0.5) | 0.5                         | (0.5-0.5) | 1654/1524                   | 0.5    | (0.5-0.5)                   | 0.5    | (0.5-0.5) |
| No                                                | 2,071,070/1,275,815                         | 1                           |           | 1                           |           | 2,180,546/1,257,438         | 1      |                             | 1      |           |
| <b>Substance abuse<sup>¶</sup></b>                |                                             |                             |           |                             |           |                             |        |                             |        |           |
| Any                                               | 131,249/91,251                              | 0.7                         | (0.7-0.7) | 0.7                         | (0.7-0.7) | 94,418/61,436               | 0.8    | (0.8-0.8)                   | 0.7    | (0.7-0.7) |
| No                                                | 1,963,931/1,210,768                         | 1                           |           | 1                           |           | 2,087,782/1,197,525         | 1      |                             | 1      |           |
| <b>Severe mental illness<sup>§¶</sup></b>         |                                             |                             |           |                             |           |                             |        |                             |        |           |
| Any                                               | 85,495/55,794                               | 0.8                         | (0.8-0.8) | 0.8                         | (0.8-0.8) | 142,318/86,399              | 0.8    | (0.8-0.8)                   | 0.8    | (0.8-0.8) |
| No                                                | 2,009,685/1,246,226                         | 1                           |           | 1                           |           | 2,039,882/1,172,562         | 1      |                             | 1      |           |
| <b>Supported psychiatric housing during 2020</b>  |                                             |                             |           |                             |           |                             |        |                             |        |           |
| Any                                               | 4617/3005                                   | 1.2                         | (1.1-1.2) | 1.2                         | (1.1-1.2) | 2826/1697                   | 1.2    | (1.1-1.2)                   | 1.2    | (1.1-1.2) |
| No                                                | 2,090,563/1,299,015                         | 1                           |           | 1                           |           | 2,179,374/1,257,264         | 1      |                             | 1      |           |
| <b>Psychiatric hospital admission during 2020</b> |                                             |                             |           |                             |           |                             |        |                             |        |           |
| Any                                               | 5122/3172                                   | 0.8                         | (0.8-0.8) | 0.8                         | (0.8-0.8) | 5731/3285                   | 0.9    | (0.9-0.9)                   | 0.9    | (0.8-0.9) |
| No                                                | 2,090,058/1,298,848                         | 1                           |           | 1                           |           | 2,176,469/1,255,677         | 1      |                             | 1      |           |
| <b>Chronic medical condition<sup>¶</sup></b>      |                                             |                             |           |                             |           |                             |        |                             |        |           |
| 1+                                                | 896,652/442,430                             | 1.3                         | (1.3-1.3) | 1.3                         | (1.3-1.3) | 1,076,597/519,022           | 1.2    | (1.2-1.2)                   | 1.2    | (1.2-1.2) |
| 0                                                 | 1,198,528/859,590                           | 1                           |           | 1                           |           | 1,105,603/739,940           | 1      |                             | 1      |           |

IRR=incidence rate ratio  
\*Person-years are rounded. All p-values are <0.0001. <sup>†</sup>Adjusted for age (5-years groups) and calendar time (months). <sup>‡</sup>Model 2 is additionally adjusted for country of origin.  
<sup>§</sup>Severe mental illness is defined as at least one of the following diagnoses: schizophrenia, bipolar disorder, or depressive disorders. <sup>¶</sup>Diagnosed prior to study start and for chronic medical conditions since Jan 1, 2016.

**Supplementary table 8: Incidence rate ratios for vaccine uptake by population group, Dec 27, 2020 to Oct 15, 2021\***

**Supplementary figure 3: Cumulative vaccine uptake by educational level and age-groups (15-64, 65-74, 75-84, and 85+ years), Dec 27, 2020 to Oct 15, 2021**

**a. Educational level (15-64 years, 65-74 years, 75-84 years, and 85+ years)**

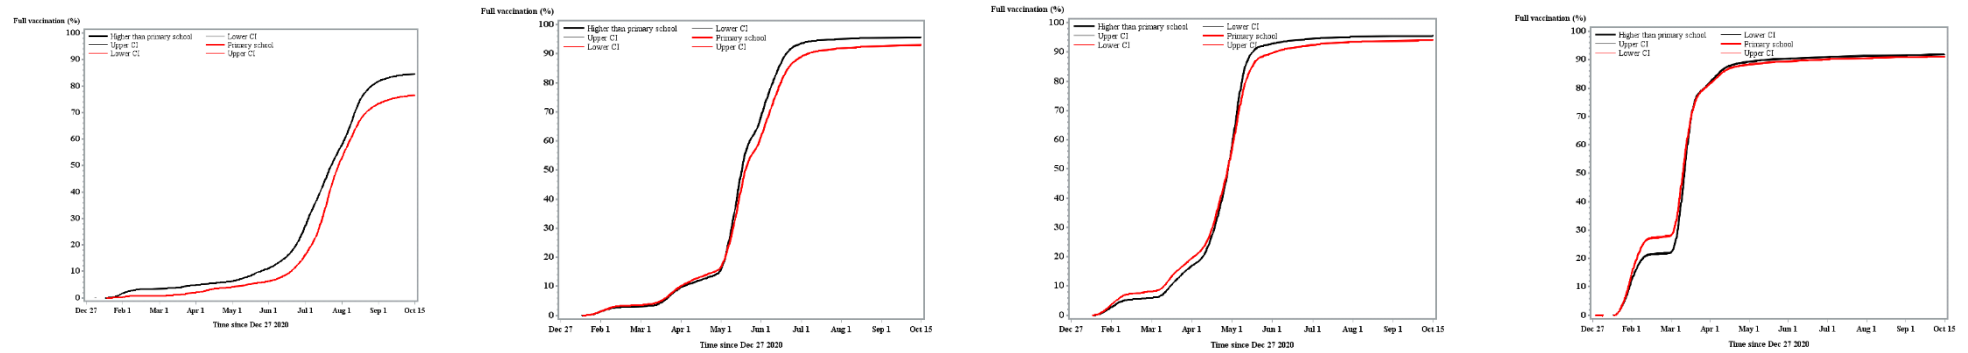

|                                                                                                                                                                                                                    | 2 <sup>nd</sup> vaccine (n) | Individuals for analysis | CIF (%) | (95% CI)    | P value | 2 <sup>nd</sup> vaccine (n) | Individuals for analysis | CIF (%) | (95% CI)    | P value |
|--------------------------------------------------------------------------------------------------------------------------------------------------------------------------------------------------------------------|-----------------------------|--------------------------|---------|-------------|---------|-----------------------------|--------------------------|---------|-------------|---------|
|                                                                                                                                                                                                                    | <b>Age 15-64 years</b>      |                          |         |             |         | <b>Age 65-74 years</b>      |                          |         |             |         |
| Primary school education                                                                                                                                                                                           | 2,231,372                   | 2,652,633                | 76.5    | (76.4-76.6) | <0.0001 | 155,741                     | 167,423                  | 93.0    | (92.9-93.2) | <0.0001 |
| Higher than primary school                                                                                                                                                                                         | 717,817                     | 939,979                  | 84.6    | (84.5-84.6) |         | 441,372                     | 461,324                  | 95.7    | (95.6-95.8) |         |
|                                                                                                                                                                                                                    | <b>Age 75-84</b>            |                          |         |             |         | <b>Age 85+</b>              |                          |         |             |         |
| Primary school education                                                                                                                                                                                           | 142,941                     | 151,959                  | 94.1    | (94.0-94.2) | <0.0001 | 58,357                      | 64,083                   | 91.1    | (90.8-91.3) | <0.0001 |
| Higher than primary school                                                                                                                                                                                         | 243,517                     | 254,736                  | 95.6    | (95.5-95.7) |         | 56,470                      | 61,526                   | 91.8    | (91.6-92.0) |         |
| CIF=cumulative incidence function                                                                                                                                                                                  |                             |                          |         |             |         |                             |                          |         |             |         |
| * Analysis has considered competing risk from death and SARS-CoV-2 infection. For the Johnson & Johnson vaccine, only one vaccine was required, and thus, the first vaccine date equal to the second vaccine date. |                             |                          |         |             |         |                             |                          |         |             |         |
| <b>Supplementary table 9: Cumulative vaccine uptake estimates by educational level and age-groups, Dec 27, 2020 to Oct 15, 2021*</b>                                                                               |                             |                          |         |             |         |                             |                          |         |             |         |

**Supplementary figure 4: Cumulative vaccine uptake by supplementary population groups and age-groups (15-64 and 65+ years), Dec 27, 2020 to Oct 15, 2021\***

**a. Crisis shelter stay during 2020†**

**(15-65 years of age)**

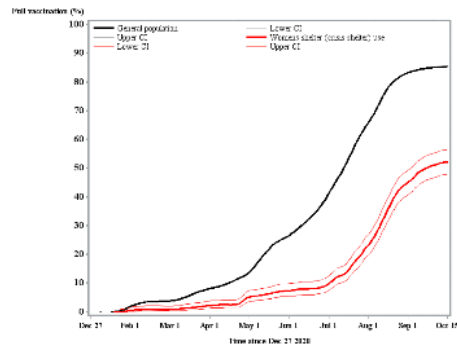

**b. New-onset severe mental illness (diagnosed during 2020)**

**(15-65 years of age)**

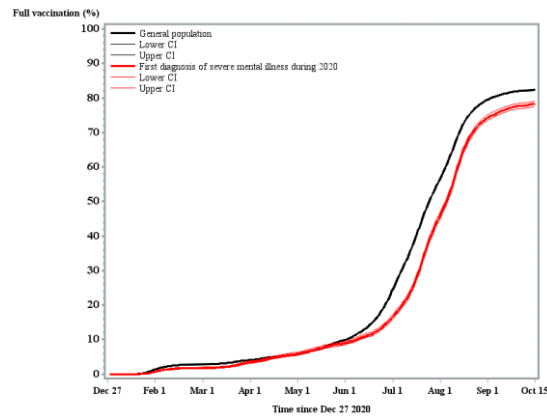

**(65+ years of age)**

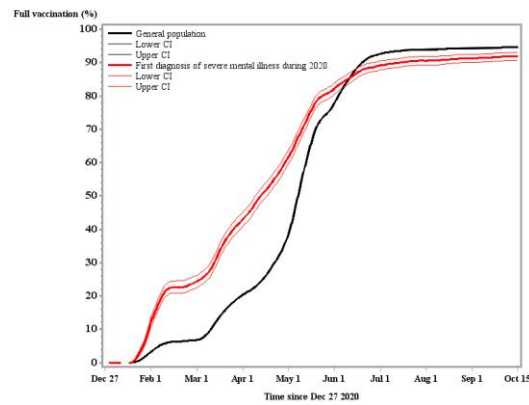

**c. Any mental disorder**

**(15-65 years of age)**

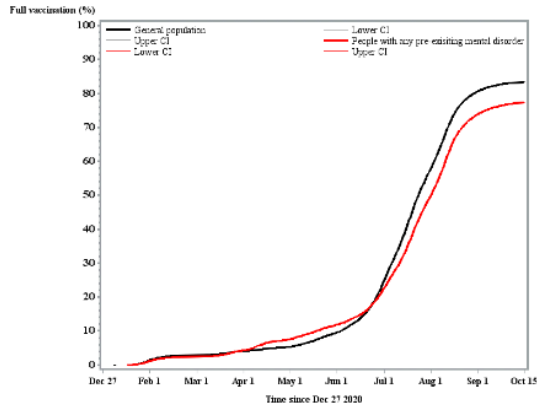

**(65+ years of age)**

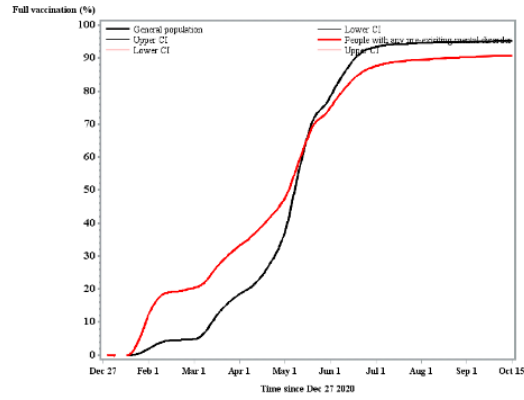

**d. Medical overweight**

**(15-65 years of age)**

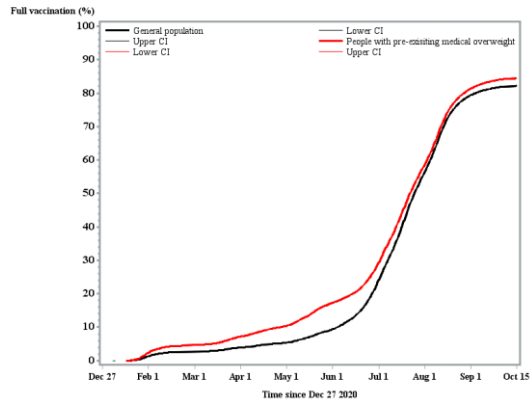

**(65+ years of age)**

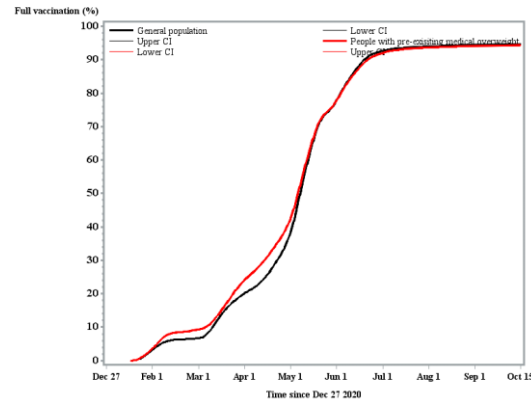

**e. History of infection with hospital contact  
(15-65 years of age)**

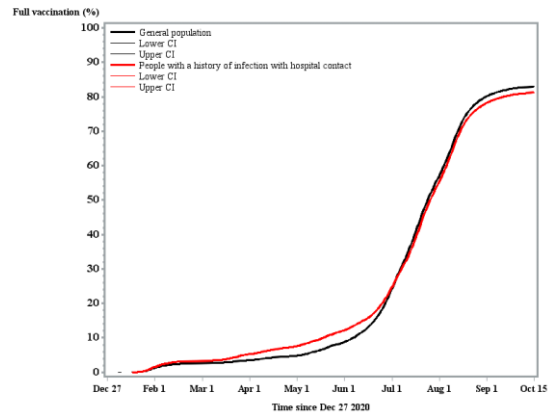

**(65+ years of age)**

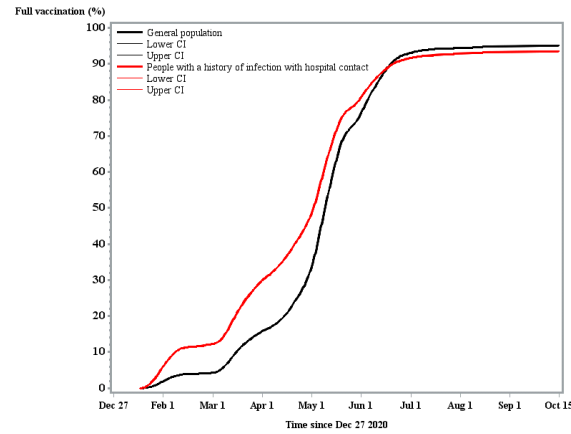

\* Analysis has considered competing risk from death and SARS-CoV-2 infection. For the Johnson & Johnson vaccine, only one vaccine was required, and thus, the first vaccine date equal to the second vaccine date. † Too few cases to present for age 65+.



|                                                                                                                                                                                                                                                                                                         | Age 15-64 years             |                          |         |             |         | Age 65+                     |                          |         |              |         |
|---------------------------------------------------------------------------------------------------------------------------------------------------------------------------------------------------------------------------------------------------------------------------------------------------------|-----------------------------|--------------------------|---------|-------------|---------|-----------------------------|--------------------------|---------|--------------|---------|
|                                                                                                                                                                                                                                                                                                         | 2 <sup>nd</sup> vaccine (n) | Individuals for analysis | CIF (%) | (95% CI)    | P value | 2 <sup>nd</sup> vaccine (n) | Individuals for analysis | CIF (%) | (95% CI)     | P value |
| The Danish general population                                                                                                                                                                                                                                                                           | 2,949,189                   | 3,592,612                | 82.4    | (82.4-82.5) |         | 1,098,398                   | 1,161,051                | 94.6    | (94.6-94.7)  |         |
| <b>Crisis shelter during 2020</b>                                                                                                                                                                                                                                                                       |                             |                          |         |             |         |                             |                          |         |              |         |
| Yes <sup>†</sup>                                                                                                                                                                                                                                                                                        | 271                         | 530                      | 51.6    | (47.3-55.8) | <0.0001 | ...                         | ...                      | ...     | ...          | ...     |
| No                                                                                                                                                                                                                                                                                                      | 2,948,918                   | 3,592,082                | 82.5    | (82.4-82.5) |         | ...                         | ...                      | ...     | ...          | ...     |
| <b>Severe mental illness diagnosed during 2020</b>                                                                                                                                                                                                                                                      |                             |                          |         |             |         |                             |                          |         |              |         |
| Yes                                                                                                                                                                                                                                                                                                     | 8512                        | 10,912                   | 78.3    | (77.5-79.0) | <0.0001 | 1889                        | 2056                     | 91.9    | (90.6-93.0)  | <0.0001 |
| No                                                                                                                                                                                                                                                                                                      | 2,940,677                   | 3,581,700                | 82.5    | (82.4-82.5) |         | 1,096,509                   | 1,158,995                | 94.6    | (94.6-94.7)  |         |
| <b>Mental disorder<sup>‡</sup></b>                                                                                                                                                                                                                                                                      |                             |                          |         |             |         |                             |                          |         |              |         |
| Yes                                                                                                                                                                                                                                                                                                     | 446,499                     | 577,967                  | 77.4    | (77.3-77.5) | <0.0001 | 136,090                     | 150,113                  | 90.7    | (90.5-90.82) | <0.0001 |
| No                                                                                                                                                                                                                                                                                                      | 2,502,690                   | 3,014,645                | 83.4    | (83.4-83.5) |         | 962,308                     | 1,010,938                | 95.2    | (95.2-95.3)  |         |
| <b>Medical overweight<sup>‡</sup></b>                                                                                                                                                                                                                                                                   |                             |                          |         |             |         |                             |                          |         |              |         |
| Yes                                                                                                                                                                                                                                                                                                     | 211,854                     | 250,859                  | 85.9    | (85.9-86.0) | <0.0001 | 65,476                      | 69,399                   | 94.9    | (94.9-95.0)  | <0.0001 |
| No                                                                                                                                                                                                                                                                                                      | 2,737,335                   | 3,341,753                | 79.0    | (78.9-79.0) |         | 1,032,922                   | 1,091,652                | 91.4    | (91.2-91.6)  |         |
| <b>History of infection with hospital contact<sup>‡</sup></b>                                                                                                                                                                                                                                           |                             |                          |         |             |         |                             |                          |         |              |         |
| Yes                                                                                                                                                                                                                                                                                                     | 957,848                     | 1,180,669                | 81.3    | (81.2-81.3) | <0.0001 | 354,335                     | 378,734                  | 93.6    | (93.5-93.7)  | <0.0001 |
| No                                                                                                                                                                                                                                                                                                      | 1,991,341                   | 2,411,943                | 83.0    | (82.8-83.1) |         | 744,063                     | 782,317                  | 95.1    | (95.1-95.2)  |         |
| CIF=cumulative incidence function                                                                                                                                                                                                                                                                       |                             |                          |         |             |         |                             |                          |         |              |         |
| *Analysis has considered competing risk from death and SARS-CoV-2 infection. For the Johnson & Johnson vaccine, only one vaccine was required, and thus, the first vaccine date equal to the second vaccine date. <sup>†</sup> Too few cases to present for age 65+. <sup>‡</sup> Prior to study start. |                             |                          |         |             |         |                             |                          |         |              |         |
| <b>Supplementary table 10: Cumulative vaccine uptake estimates by supplementary population groups and age-groups, Dec 27, 2020 to Oct 15, 2021*</b>                                                                                                                                                     |                             |                          |         |             |         |                             |                          |         |              |         |

|                                                                                                                                         | 2 <sup>nd</sup> vaccine<br>(n)/person-years | Male<br>Model 1*<br>IRR | 95% CI    | P value | 2 <sup>nd</sup> vaccine<br>(n)/person-years | Female<br>Model 1*<br>IRR | 95% CI    | P value |
|-----------------------------------------------------------------------------------------------------------------------------------------|---------------------------------------------|-------------------------|-----------|---------|---------------------------------------------|---------------------------|-----------|---------|
| <b>Overall</b>                                                                                                                          | 2,095,180/1,302,020                         |                         |           |         | 2,182,200/1,258,961                         |                           |           |         |
| <b>Educational level</b>                                                                                                                |                                             |                         |           |         |                                             |                           |           |         |
| Primary school                                                                                                                          | 563,076/385,640                             | 0.8                     | (0.8-0.8) | <0.0001 | 596,455/349,981                             | 0.8                       | (0.8-0.8) | <0.0001 |
| Higher than primary school                                                                                                              | 1,532,104/916,379                           | 1                       |           |         | 1,585,745/908,980                           | 1                         |           |         |
| <b>Crisis shelter use during 2020</b>                                                                                                   |                                             |                         |           |         |                                             |                           |           |         |
| Yes                                                                                                                                     | 31/46                                       | 0.4                     | (0.3-0.6) | <0.0001 | 514/663                                     | 0.5                       | (0.4-0.5) | <0.0001 |
| No                                                                                                                                      | 2,095,149/1,301,974                         | 1                       |           |         | 2,181,686/1,258,298                         | 1                         |           |         |
| <b>Severe mental illness diagnosed during 2020</b>                                                                                      |                                             |                         |           |         |                                             |                           |           |         |
| Yes                                                                                                                                     | 4202/2936                                   | 0.9                     | (0.9-1.0) | <0.0001 | 6704/4421                                   | 1.0                       | (0.9-1.0) | <0.0001 |
| No                                                                                                                                      | 2,090,978/1,299,084                         | 1                       |           |         | 2,175,496/1,254,541                         | 1                         |           |         |
| <b>Any mental disorder<sup>†</sup></b>                                                                                                  |                                             |                         |           |         |                                             |                           |           |         |
| Yes                                                                                                                                     | 259,158/179,121                             | 0.8                     | (0.8-0.8) | <0.0001 | 352,261/221,061                             | 0.8                       | (0.8-0.8) | <0.0001 |
| No                                                                                                                                      | 1,836,022/1,122,899                         | 1                       |           |         | 1,829,939/1037,901                          | 1                         |           |         |
| <b>Medical overweight<sup>†</sup></b>                                                                                                   |                                             |                         |           |         |                                             |                           |           |         |
| Yes                                                                                                                                     | 64164/33031                                 | 1.2                     | (1.1-1.2) | <0.0001 | 226864/133857                               | 1.0                       | (1.0-1.0) | <0.0001 |
| No                                                                                                                                      | 2031016/1268989                             | 1                       |           |         | 1955336/1125105                             | 1                         |           |         |
| <b>History of infection with hospital contact<sup>†</sup></b>                                                                           |                                             |                         |           |         |                                             |                           |           |         |
| Yes                                                                                                                                     | 651944/396594                               | 1.1                     | (1.1-1.1) | <0.0001 | 747788/437290                               | 1.0                       | (1.0-1.0) | <0.0001 |
| No                                                                                                                                      | 1443236/905425                              | 1                       |           |         | 1434412/821672                              | 1                         |           |         |
| IRR=incidence rate ratio                                                                                                                |                                             |                         |           |         |                                             |                           |           |         |
| Person-years are rounded. *Adjusted for age (5-years groups) and calendar time (months). <sup>†</sup> Prior to study start.             |                                             |                         |           |         |                                             |                           |           |         |
| <b>Supplementary table 11: Incidence rate ratios of vaccine uptake by supplementary population groups, Dec 27, 2020 to Oct 15, 2021</b> |                                             |                         |           |         |                                             |                           |           |         |

**Supplementary figure 5: Cumulative vaccine uptake of first vaccine dose by population groups and age-groups (15-64 and 65+ years), Dec 27, 2020 to Oct 15, 2021\***

**a. Homelessness**

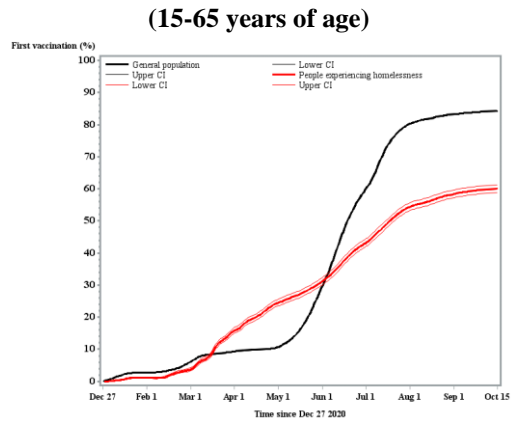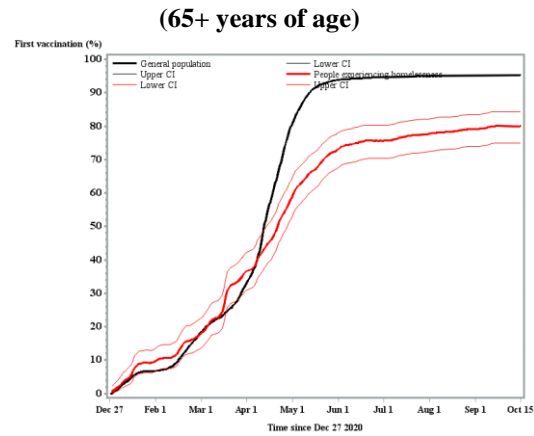

**b. Imprisonment**

**(15-65 years of age)**

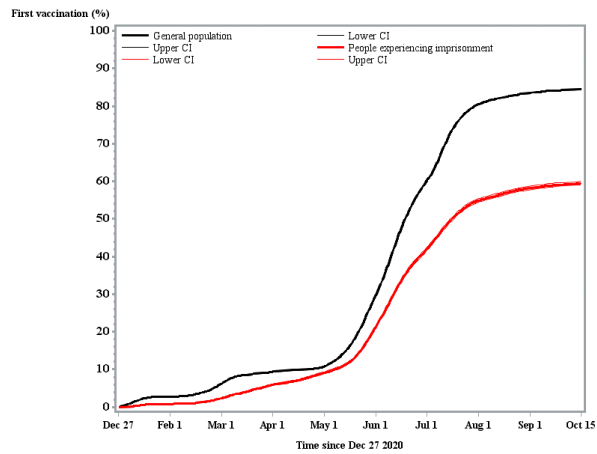

**(65+ years of age)**

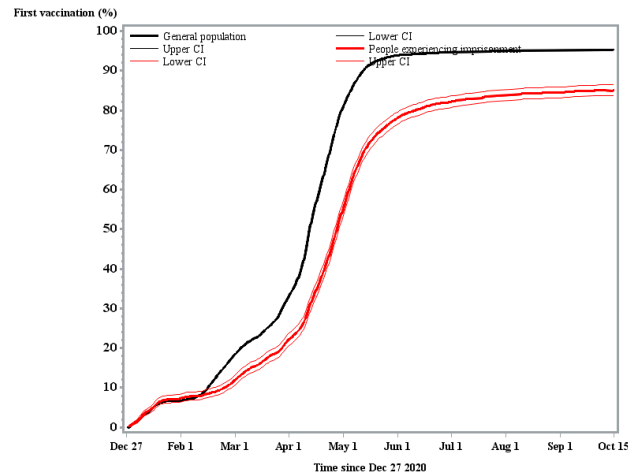

**c. Substance abuse  
(15-65 years of age)**

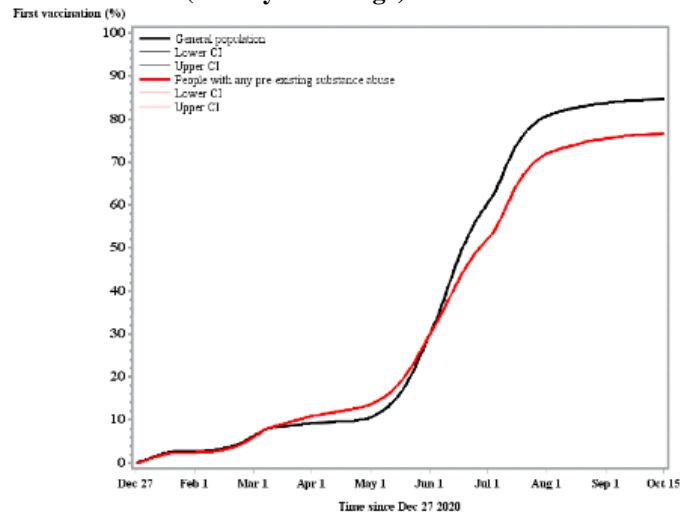

**(65+ years of age)**

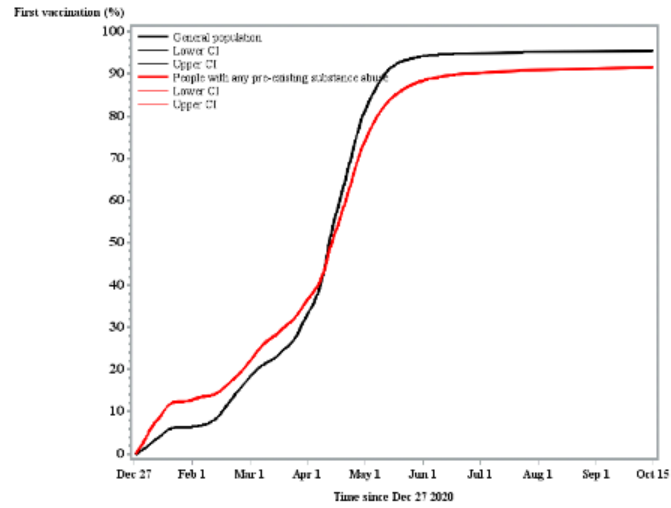

**d. Severe mental illness  
(15-65 years of age)**

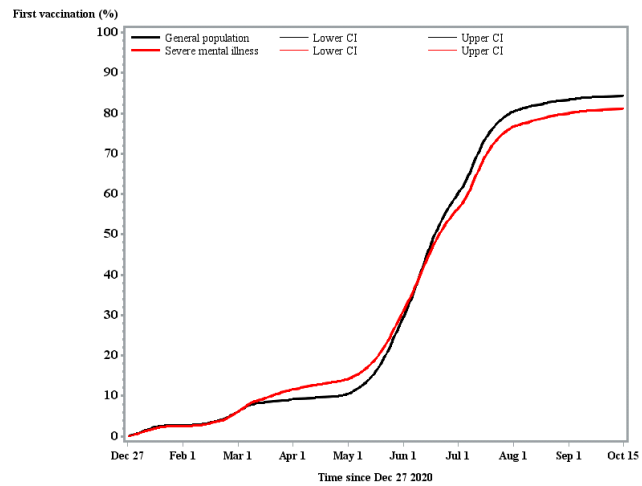

**(65+ years of age)**

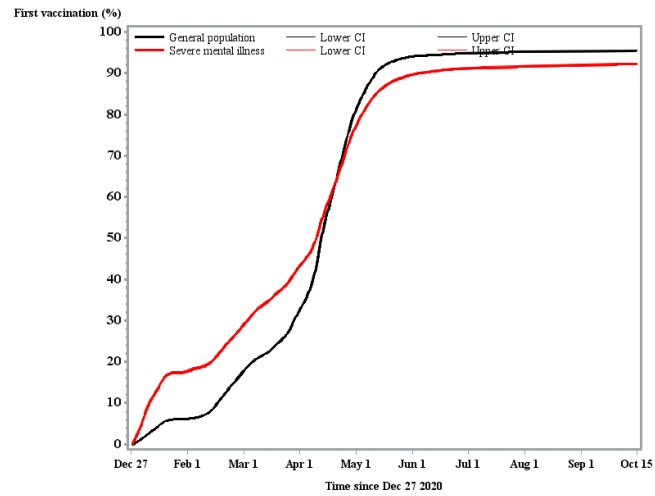

**e. Supported psychiatric housing during 2020**

**(15-65 years of age)**

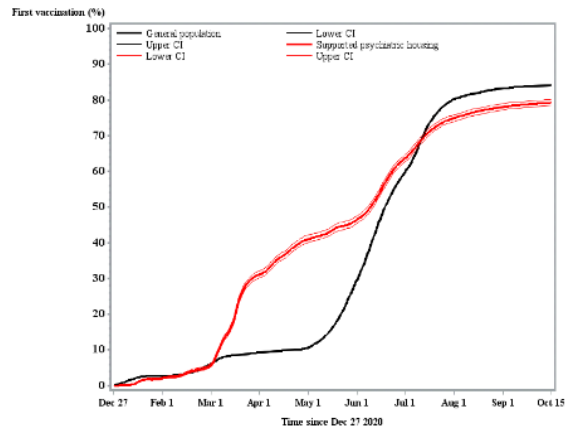

**(65+ years of age)**

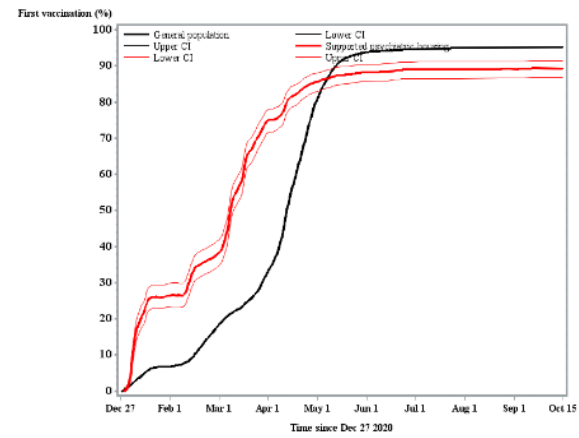

**f. Psychiatric hospital admission during 2020**

**(15-65 years of age)**

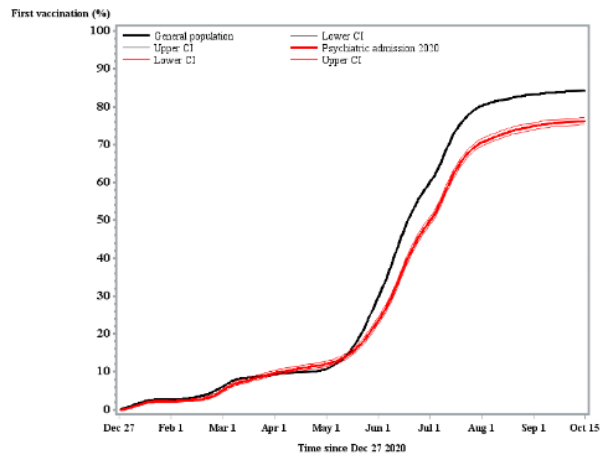

**(65+ years of age)**

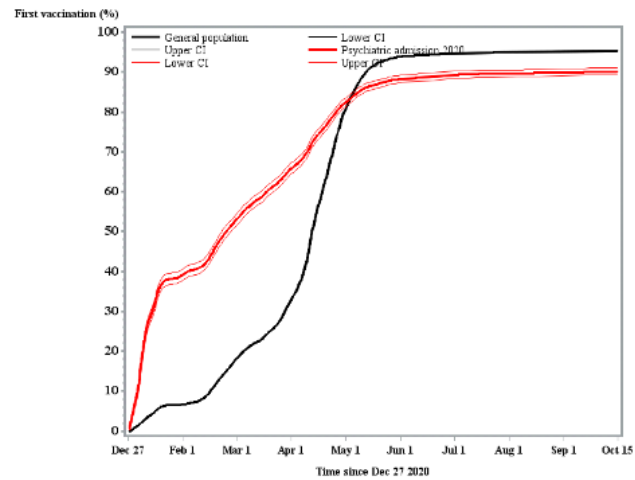

**g. Chronic medical condition  
(15-65 years of age)**

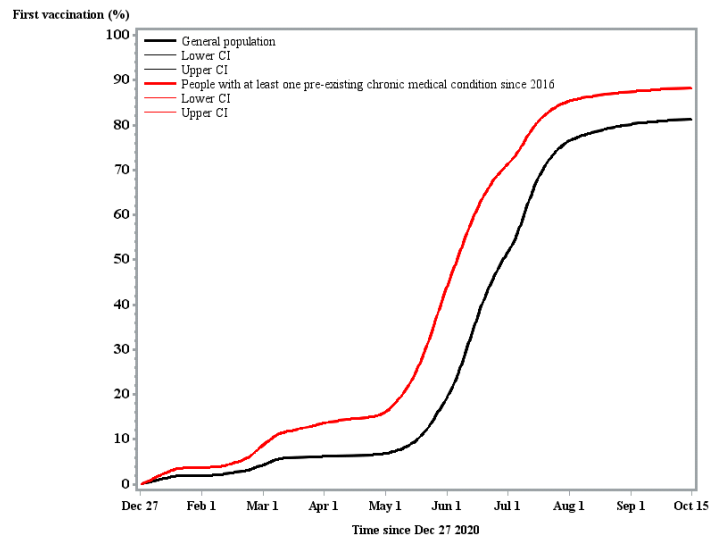

**(65+ years of age)**

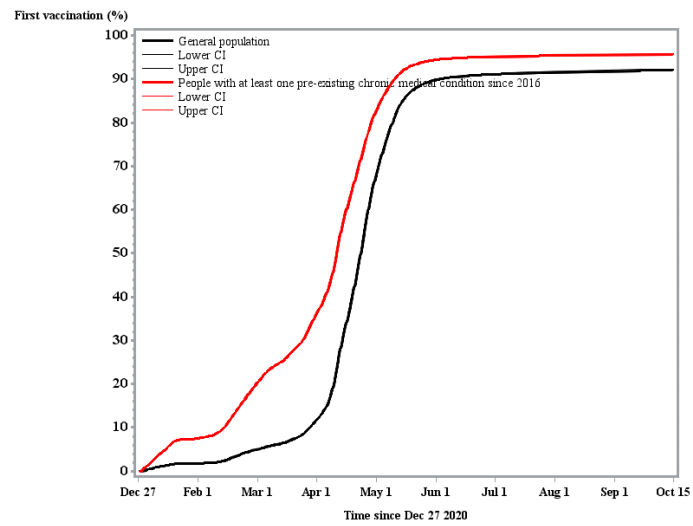

\*Analysis has considered competing risk from death and SARS-CoV-2 infection.

|                                                   | Age 15-64 years         |                          |         |             |         | Age 65+                 |                          |         |             |         |
|---------------------------------------------------|-------------------------|--------------------------|---------|-------------|---------|-------------------------|--------------------------|---------|-------------|---------|
|                                                   | 1 <sup>st</sup> vaccine | Individuals for analysis | CIF (%) | (95% CI)    | P value | 1 <sup>st</sup> vaccine | Individuals for analysis | CIF (%) | (95% CI)    | P value |
| The Danish general population                     | 3,010,088               | 3,588,836                | 84.2    | (84.2-84.2) |         | 1,103,566               | 1,158,361                | 95.3    | (95.2-95.3) |         |
| <b>Homelessness during 2020</b>                   |                         |                          |         |             |         |                         |                          |         |             |         |
| Yes                                               | 3838                    | 6405                     | 60.1    | (58.9-61.3) | <0.0001 | 225                     | 281                      | 80.1    | (74.9-84.3) | <0.0001 |
| No                                                | 3,006,250               | 3,582,431                | 84.2    | (84.2-84.3) |         | 1,103,341               | 1,158,080                | 95.3    | (95.3-95.3) |         |
| <b>Imprisonment during 2020</b>                   |                         |                          |         |             |         |                         |                          |         |             |         |
| Yes                                               | 24,011                  | 40,458                   | 59.5    | (59.0-60.0) | <0.0001 | 2303                    | 2709                     | 85.1    | (83.7-86.4) | <0.0001 |
| No                                                | 2,986,077               | 3,548,378                | 84.5    | (84.4-84.5) |         | 1,101,263               | 1,155,652                | 95.3    | (95.3-95.4) |         |
| <b>Substance abuse<sup>†</sup></b>                |                         |                          |         |             |         |                         |                          |         |             |         |
| Yes                                               | 163,886                 | 213,999                  | 76.7    | (76.5-76.9) | <0.0001 | 60,811                  | 66,420                   | 91.6    | (91.4-91.8) | <0.0001 |
| No                                                | 2,846,202               | 3,374,837                | 84.7    | (84.6-84.7) |         | 1,042,755               | 1,091,941                | 95.5    | (95.5-95.6) |         |
| <b>Severe mental illness<sup>†</sup></b>          |                         |                          |         |             |         |                         |                          |         |             |         |
| Yes                                               | 165,169                 | 203,652                  | 81.2    | (81.0-81.4) | <0.0001 | 58,834                  | 63,782                   | 92.3    | (92.0-92.5) | <0.0001 |
| No                                                | 2,844,919               | 3,385,184                | 84.4    | (84.3-84.4) |         | 1,044,732               | 1,094,579                | 95.5    | (95.4-95.5) |         |
| <b>Supported psychiatric housing during 2020</b>  |                         |                          |         |             |         |                         |                          |         |             |         |
| Yes                                               | 6753                    | 8523                     | 79.4    | (78.5-80.2) | <0.0001 | 631                     | 706                      | 89.4    | (86.9-91.4) | <0.0001 |
| No                                                | 3,003,335               | 3,580,313                | 84.2    | (84.2-84.2) |         | 1,102,935               | 1,157,655                | 95.3    | (95.3-95.3) |         |
| <b>Psychiatric hospital admission during 2020</b> |                         |                          |         |             |         |                         |                          |         |             |         |
| Yes                                               | 6458                    | 8493                     | 76.3    | (75.3-77.2) | <0.0001 | 4118                    | 4567                     | 90.2    | (89.3-91.0) | <0.0001 |
| No                                                | 3,003,630               | 3,580,343                | 84.2    | (84.2-82.3) |         | 1,099,448               | 1,153,794                | 95.3    | (95.3-95.3) |         |
| <b>Chronic medical condition<sup>‡</sup></b>      |                         |                          |         |             |         |                         |                          |         |             |         |
| Yes                                               | 1,322,460               | 1,501,001                | 88.2    | (88.1-88.2) | <0.0001 | 969,598                 | 1,012,859                | 95.7    | (95.7-95.8) | <0.0001 |
| No                                                | 1,687,628               | 2,087,835                | 81.3    | (81.2-81.4) |         | 133,968                 | 145,502                  | 92.1    | (92.0-92.3) |         |

CIF=cumulative incidence function  
\*Analysis has considered competing risk from death and SARS-CoV-2 infection. <sup>†</sup>Any diagnosis prior to study start. <sup>‡</sup>Defined as any diagnosis from Jan 1, 2016 to study start.

**Supplementary table 12: Cumulative vaccine uptake estimates of first dose by population groups and age-groups (15-64 and 65+ years), Dec 27, 2020 to Oct 15, 2021\***

|                                                                                                                                                                                                                     | Male<br>Model 1*                            |     |           | Female<br>Model 1*                          |     |           |
|---------------------------------------------------------------------------------------------------------------------------------------------------------------------------------------------------------------------|---------------------------------------------|-----|-----------|---------------------------------------------|-----|-----------|
|                                                                                                                                                                                                                     | 1 <sup>st</sup><br>vaccine/person<br>-years | IRR | 95% CI    | 1 <sup>st</sup><br>vaccine/person<br>-years | IRR | 95% CI    |
| <b>Overall</b>                                                                                                                                                                                                      | 2,124,344/1,110,112                         |     |           | 2,208,086/1,047,785                         |     |           |
| <b>Homelessness during 2020</b>                                                                                                                                                                                     |                                             |     |           |                                             |     |           |
| Yes                                                                                                                                                                                                                 | 3207/2726                                   | 0.6 | (0.6-0.6) | 998/927                                     | 0.5 | (0.5-0.5) |
| No                                                                                                                                                                                                                  | 2,121,137/1,107,386                         | 1   |           | 2,207,088/1,046,858                         | 1   |           |
| <b>Imprisonment during 2020</b>                                                                                                                                                                                     |                                             |     |           |                                             |     |           |
| Yes                                                                                                                                                                                                                 | 25,404/23,711                               | 0.5 | (0.5-0.5) | 1736/1348                                   | 0.5 | (0.5-0.6) |
| No                                                                                                                                                                                                                  | 2,098,940/1,086,402                         | 1   |           | 2,206,350/1,046,437                         | 1   |           |
| <b>Substance abuse<sup>†</sup></b>                                                                                                                                                                                  |                                             |     |           |                                             |     |           |
| Yes                                                                                                                                                                                                                 | 134,780/78,974                              | 0.7 | (0.7-0.7) | 96,635/52,085                               | 0.8 | (0.8-0.8) |
| No                                                                                                                                                                                                                  | 1,989,564/1,031,138                         | 1   |           | 2,111,451/995,700                           | 1   |           |
| <b>Severe mental illness<sup>†</sup></b>                                                                                                                                                                            |                                             |     |           |                                             |     |           |
| Yes                                                                                                                                                                                                                 | 87,336/47,869                               | 0.8 | (0.8-0.8) | 144,787/72,690                              | 0.8 | (0.8-0.9) |
| No                                                                                                                                                                                                                  | 2,037,008/1,062,243                         | 1   |           | 2,063,299/975,095                           | 1   |           |
| <b>Psychiatric housing during 2020</b>                                                                                                                                                                              |                                             |     |           |                                             |     |           |
| Yes                                                                                                                                                                                                                 | 4788/2588                                   | 1.2 | (1.2-1.2) | 2906/1446                                   | 1.2 | (1.2-1.2) |
| No                                                                                                                                                                                                                  | 2,119,556/1,107,525                         | 1   |           | 2,205,180/1,046,339                         | 1   |           |
| <b>Psychiatric hospital admission during 2020</b>                                                                                                                                                                   |                                             |     |           |                                             |     |           |
| Yes                                                                                                                                                                                                                 | 5290/2701                                   | 0.9 | (0.8-0.9) | 5867/2750                                   | 0.9 | (0.9-0.9) |
| No                                                                                                                                                                                                                  | 2,119,054/1,107,411                         | 1   |           | 2,202,219/1,045,035                         | 1   |           |
| <b>Chronic medical condition<sup>‡</sup></b>                                                                                                                                                                        |                                             |     |           |                                             |     |           |
| Yes                                                                                                                                                                                                                 | 903,540/364,536                             | 1.3 | (1.3-1.3) | 1,084,423/420,695                           | 1.2 | (1.2-1.2) |
| No                                                                                                                                                                                                                  | 1,220,804/745,577                           | 1   |           | 1,123,663/627,090                           | 1   |           |
| IRR=incidence rate ratio                                                                                                                                                                                            |                                             |     |           |                                             |     |           |
| Person-years are rounded. *Adjusted for age (5-years groups) and calendar time (months). All p-values were <0.0001. †Any diagnosis prior to study start. ‡Defined as any diagnosis from Jan 1, 2016 to study start. |                                             |     |           |                                             |     |           |
| <b>Supplementary table 13: Incidence rate ratio of vaccine uptake of first dose by population groups, Dec 27, 2020 to Oct 15, 2021</b>                                                                              |                                             |     |           |                                             |     |           |



|                                                                                                                                                | 2 <sup>nd</sup> vaccine<br>(n)/person-years | Male<br>Model 1*<br>IRR | 95% CI    | P value | 2 <sup>nd</sup> vaccine<br>(n)/person-years | Female<br>Model 1*<br>IRR | 95% CI    | P value |
|------------------------------------------------------------------------------------------------------------------------------------------------|---------------------------------------------|-------------------------|-----------|---------|---------------------------------------------|---------------------------|-----------|---------|
| <b>Overall</b>                                                                                                                                 | 2,095,180/1,302,020                         |                         |           |         | 2,182,200/1,258,961                         |                           |           |         |
| <b>History of homelessness</b>                                                                                                                 |                                             |                         |           |         |                                             |                           |           |         |
| Yes                                                                                                                                            | 19,816/18,055                               | 0.5                     | (0.5-0.5) | <0.0001 | 9188/8452                                   | 0.5                       | (0.5-0.5) | <0.0001 |
| No                                                                                                                                             | 2,075,364/1,283,964                         | 1                       |           |         | 2,173,012/1,250,509                         | 1                         |           |         |
| <b>History of imprisonment</b>                                                                                                                 |                                             |                         |           |         |                                             |                           |           |         |
| Yes                                                                                                                                            | 64,031/57,016                               | 0.5                     | (0.5-0.6) | <0.0001 | 5346/4439                                   | 0.5                       | (0.5-0.5) | <0.0001 |
| No                                                                                                                                             | 2,031,149/1,245,004                         | 1                       |           |         | 2,176,854/1,254,522                         | 1                         |           |         |
| <b>Numbers of chronic medical conditions<sup>†</sup></b>                                                                                       |                                             |                         |           |         |                                             |                           |           |         |
| 3+                                                                                                                                             | 99,032/37,234                               | 1.5                     | (1.5-1.5) | <0.0001 | 131,879/50,716                              | 1.3                       | (1.3-1.3) | <0.0001 |
| 2                                                                                                                                              | 245,825/106,764                             | 1.3                     | (1.3-1.4) |         | 308,849/133,804                             | 1.2                       | (1.2-1.2) |         |
| 1                                                                                                                                              | 551,795/298,432                             | 1.2                     | (1.2-1.2) |         | 635,869/334,503                             | 1.2                       | (1.2-1.2) |         |
| 0                                                                                                                                              | 1,198,528/859,590                           | 1                       |           |         | 1,105,603/739,940                           | 1                         |           |         |
| IRR=incidence rate ratio                                                                                                                       |                                             |                         |           |         |                                             |                           |           |         |
| Person-years are rounded. *Adjusted for age (5-years groups) and calendar time (months). <sup>†</sup> From Jan 1, 2016 to study start.         |                                             |                         |           |         |                                             |                           |           |         |
| <b>Supplementary table 14: Incidence rate ratios vaccine uptake by population groups using other definitions, Dec 27, 2020 to Oct 15, 2021</b> |                                             |                         |           |         |                                             |                           |           |         |

## References

1. Statistics Denmark. Shelters. 2020. <https://www.dst.dk/en/Statistik/dokumentation/documentationofstatistics/shelters> (accessed Oct 15, 2021).
2. National Board of Health. The Registry of Drug Abusers Undergoing Treatment. 2020. <https://sundhedsdatastyrelsen.dk/da/registre-og-services/om-de-nationale-sundhedsregistre/sygdomme-laegemidler-og-behandlinger/stofmisbrugere-i-behandling> (accessed March 5, 2021).
3. National Board of Health. The National Registry of Alcohol Treatment. 2020. <https://sundhedsdatastyrelsen.dk/da/registre-og-services/om-de-nationale-sundhedsregistre/sygdomme-laegemidler-og-behandlinger/alkoholbehandlingsregisteret> (accessed March 5, 2021).
4. Statistics Denmark. Imprisonments 2020. <https://www.dst.dk/en/Statistik/dokumentation/documentationofstatistics/imprisonments> (accessed November 20, 2021).
5. Schmidt M, Schmidt SA, Sandegaard JL, Ehrenstein V, Pedersen L, Sørensen HT. The Danish National Patient Registry: a review of content, data quality, and research potential. *Clin Epidemiol* 2015; **7**: 449-90.
6. Mors O, Perto GP, Mortensen PB. The Danish Psychiatric Central Research Register. *Scand J Public Health* 2011; **39**: 54-7.
7. Pottegård A, Schmidt SAJ, Wallach-Kildemoes H, Sørensen HT, Hallas J, Schmidt M. Data Resource Profile: The Danish National Prescription Registry. *Int J Epidemiol* 2017; **46**: 798-f.
8. Ministry of the Interior and Housing. Tilbudsportalen. 2021. <https://tilbudsportalen.dk/tilbudssoegning/landing/index> (accessed August 8, 2021).
9. Agency for Data Supply and Efficiency. Denmark's addresses. 2020. <https://danmarksadresser.dk/adresser-i-danmark/> (accessed September 15, 2020).
10. Momen NC, Plana-Ripoll O, Agerbo E, et al. Association between Mental Disorders and Subsequent Medical Conditions. *N Engl J Med* 2020; **382**: 1721-31.
11. Prior A, Fenger-Grøn M, Larsen KK, et al. The Association Between Perceived Stress and Mortality Among People With Multimorbidity: A Prospective Population-Based Cohort Study. *Am J Epidemiol* 2016; **184**: 199-210.
12. Ribe AR, Vestergaard M, Katon W, et al. Thirty-Day Mortality After Infection Among Persons With Severe Mental Illness: A Population-Based Cohort Study in Denmark. *Am J Psychiatry* 2015; **172**: 776-83.
13. Danish Health Authority. The Danish Vaccination Programme Against COVID-19. 2021. <https://www.sst.dk/-/media/English/Publications/2021/Corona/Vaccination/The-Danish-Vaccination-Programme-Against-COVID-19.ashx?la=en&hash=C5AC701C8D17412ABA3B1871CF2BF2B90B1353E4> (accessed Dec 19 2021).
